# Supplementary material for: From 1,2-dialkoxyalkanes to 1,4-dioxanes. A transformation mediated by NbCl5via multiple C–O bond cleavage at room temperature
Source: Royal Society of Chemistry journal article supplement (doi:10.1039/b804432e), 2008-01-01
Supplement: b804432e.pdf [file b804432e.pdf]

**From 1,2-Dialkoxyalkanes to 1,4-Dioxanes. A Transformation Mediated by NbCl<sub>5</sub> via  
Multiple C–O Bond Cleavage at Room Temperature\*\***

*Fabio Marchetti, Guido Pampaloni\* and Stefano Zacchini*

**SUPPLEMENTARY MATERIAL**

**Analytical and spectroscopical data for compound 2.** Anal. Calcd for C<sub>4</sub>H<sub>10</sub>Cl<sub>3</sub>O<sub>3</sub>Nb: C, 15.7; H, 3.3; Nb, 30.4; Cl, 34.8. Found: C, 15.9; H, 3.2; Nb, 29.8; Cl, 34.0. IR (solid state): 2946w, 1466m, 1448m-s, 1277w-m, 1238w-m, 1188w, 1123w, 1071m, 1016s, 984s, 954vs [ $\nu_{\text{Nb=O}}$ ], 927ms, 854vs, 818s cm<sup>-1</sup>. <sup>1</sup>H NMR (400 MHz, CDCl<sub>3</sub>):  $\delta$  = 4.20 (s, 2H, CH<sub>2</sub>), 3.98 ppm (s, 3H, CH<sub>3</sub>). <sup>13</sup>C NMR (400 MHz, CDCl<sub>3</sub>):  $\delta$  = 74.0 (CH<sub>2</sub>), 63.5 ppm (CH<sub>3</sub>).

**NMR data for compound 4.** <sup>1</sup>H NMR (400 MHz, CDCl<sub>3</sub>):  $\delta$  = 5.23 (t, 2H, <sup>3</sup>J<sub>HH</sub> = 5.49 Hz, CH<sub>2</sub>ONb), 4.43 (t, 2H, <sup>3</sup>J<sub>HH</sub> = 5.49 Hz, CH<sub>2</sub>OMe), 4.02 (s, 3H, Me) ppm. <sup>13</sup>C NMR (400 MHz, CDCl<sub>3</sub>):  $\delta$  78.7 (CH<sub>2</sub>ONb), 78.3 (CH<sub>2</sub>OMe), 65.2 (Me) ppm.
